# Supplementary material for: Impact of psoriatic arthritis and comorbidities on ustekinumab outcomes in psoriasis: a retrospective, observational BADBIR cohort study
Source: HighWire-hosted journal article supplement (doi:10.1136/rmdopen-2022-002533), 2023-01-01
Supplement: rmdopen-2022-002533supp001_data_supplement.pdf [file rmdopen-2022-002533supp001_data_supplement.pdf]

**Online supplement****Supplemental figure S1** Employment status by presence of comorbid PsA and treatment type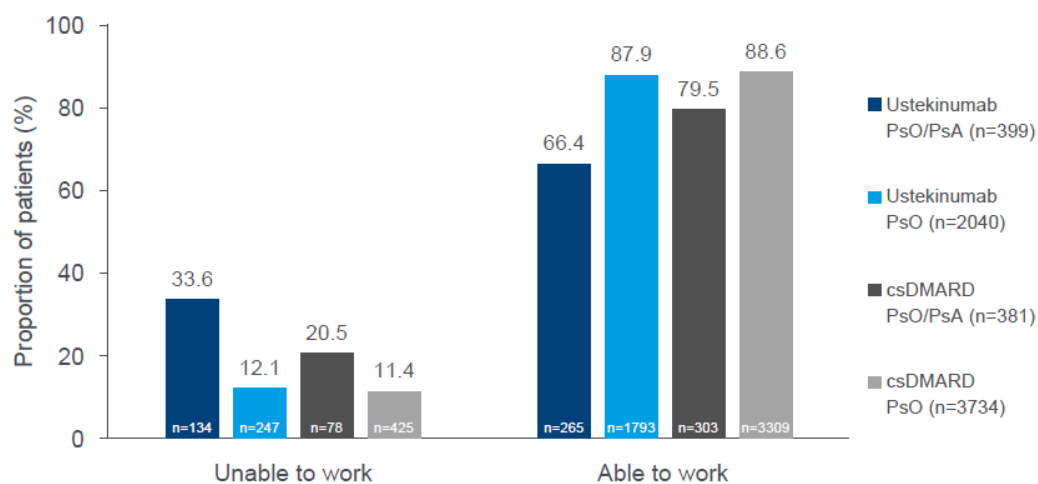

csDMARD, conventional systemic disease-modifying anti-rheumatic drug; PsA, psoriatic arthritis; PsO, psoriasis.
